# Supplementary material for: Beta-Sitosterol Promotes Milk Protein and Fat Syntheses-Related Genes in Bovine Mammary Epithelial Cells
Source: MDPI journal article supplement (doi:10.3390/ani11113238), 2021-11-12
Supplement: s1 [file s1]

Supplementary Material

# Beta-Sitosterol Promotes Milk Protein and Fat Syntheses-Related Genes in Bovine Mammary Epithelial Cells

XinLu Liu †, JingLin Shen †, JinXin Zong, JiaYi Liu and YongCheng Jin \*

Department of Animal Science, College of Animal Science, Jilin University, 5333 Xi'an Road, Changchun 130062, China; liuxinlu629@163.com (X.L.); shenjinglinshen@aliyun.com (J.S.); zongjx19@163.com (J.Z.); loki980125@163.com (J.L.)

\* Correspondence: ycj@jlu.edu.cn

† These authors contributed equally to this work.

**Citation:** Liu, X.; Shen, J.; Zong, J.; Liu, J.; Jin, Y. Beta-Sitosterol Promotes Milk Protein and Fat Syntheses-Related Genes in Bovine Mammary Epithelial Cells. *Animals* **2021**, *11*, 3238. <https://doi.org/10.3390/ani11113238>

Academic Editor: Donata Marletta

Received: 13 September 2021

Accepted: 10 November 2021

Published: 12 November 2021

**Publisher's Note:** MDPI stays neutral with regard to jurisdictional claims in published maps and institutional affiliations.

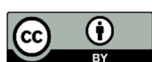

**Copyright:** © 2021 by the authors. Licensee MDPI, Basel, Switzerland. This article is an open access article distributed under the terms and conditions of the Creative Commons Attribution (CC BY) license (<http://creativecommons.org/licenses/by/4.0/>).

**Table S1.** Bos taurus (cattle) primers used for qPCR.

| Gene Name <sup>1</sup> | Accession Number | Primers Sequence                                                     | Product Size, bp |
|------------------------|------------------|----------------------------------------------------------------------|------------------|
| $\beta$ -actin         | NM_173979.3      | F: 5'-CCCTGGAGAAGAGCTACGAG-3'<br>R: 5'-GTAGTTTCGTGAATGCCGCAG-3'      | 130              |
| $\beta$ -casein        | XM_015471671.2   | F: 5'-GGCTATGGCTCCTAAGCACA-3'<br>R: 5'-GTCAGGCTCTGCCTTTCAGT-3'       | 78               |
| JAK2                   | XM_005209981.4   | F: 5'-CAAGACCAGATGGATGCCCAG-3'<br>R: 5'-ACTCGAACTGCTAGGTCTCTGA-3'    | 103              |
| STAT5                  | NM_174617.4      | F: 5'-GAGAACACCCGCAATGATTAC-3'<br>R: 5'-TCACCGACTCTGCTCCACG-3'       | 151              |
| ELF5                   | NM_001024569.1   | F: 5'-CATCCGCTCACAAGGTTACTC-3'<br>R: 5'-CTCGCACAAATTCCTCATAGAT-3'    | 170              |
| PI3K                   | NM_001206047.1   | F: 5'-GTCTGGACCTTCGGATGCTAC-3'<br>R: 5'-TAAACTCCTCAATGGCTCGGT-3'     | 213              |
| AKT1                   | NM_173986.2      | F: 5'-GCACAAGCGAGGTGAGTACAT-3'<br>R: 5'-GCCACGGAGAAGTTGTTGAG-3'      | 138              |
| mTOR                   | XM_002694043.6   | F: 5'-CGAAGAACCAATTATACCCGC-3'<br>R: 5'-CATAGCAACCTCAAAGCAGTCC-3'    | 153              |
| S6K1                   | NM_205816.1      | F: 5'-AATGCTGCTTCTCGTCTTGGA-3'<br>R: 5'-CAGTTCTTCCAGTTAATATGTCT-3'   | 90               |
| 4EBP1                  | NM_001077893     | F: 5'-TCACTAGCCCTACAGGCGAT-3'<br>R: 5'-AAACTGTGACTCTTCACCGC-3'       | 101              |
| eIF4E                  | NM_174310.3      | F: 5'-CCCGCCTACAGAAGAAGAGA-3'<br>R: 5'-CAGTATCAAACCTTAGAGATCAATCG-3' | 164              |
| ACC                    | NM_174224.2      | F: 5'-GGAGACAAACAGGGACCATTAC-3'<br>R: 5'-GTGGAAGGAATGCTTGGGAG-3'     | 187              |
| FASN                   | NM_001012669.1   | F: 5'-GACCTGGGAGGAGTGTAAGC-3'<br>R: 5'-GCGATAGCGTCCATGAAGTA-3'       | 198              |
| SCD                    | NM_173959.4      | F: 5'-CCACGTTCTTCATTGATTGC-3'<br>R: 5'-CAGCCACTCTTGTAAGCTTTCC-3'     | 121              |
| LPL                    | NM_001075120.1   | F: 5'-TCACTTCAACCACAGCAGCA-3'<br>R: 5'-GATGACGTTGGAGTCCGGTT-3'       | 127              |
| SREBP1                 | NM_001113302.1   | F: 5'-CGCTCTTCCATCAATGACA-3'<br>R: 5'-TTCAGCGATTGCTTTTGTG-3'         | 188              |
| PSMA5                  | NM_001015566.1   | F: 5'-CATGAGTGGGCTAATTGCTG-3'<br>R: 5'-AGCCTGAGTCACACTCTCCA-3'       | 115              |
| GH1                    | NM_180996.1      | F: 5'-GCAGATCCTCAAGCAGACCT-3'<br>R: 5'-CAGGAGAGCAGACCGTAGTT-3'       | 87               |
| GHR                    | NM_176608.1      | F: 5'-AGACCACTTCTCATTGGTGA-3'<br>R: 5'-ATGTCGCTTACCTGGGCATA-3'       | 110              |
| IGF-1                  | NM_001077828.1   | F: 5'-CCATCACATCCTCCTCGCAT-3'<br>R: 5'-ATAAAGCCCTGTCTCCGC-3'         | 143              |
| IGF-1R                 | NM_001244612.1   | F: 5'-CACGAGTGGAGAAATCTGCG-3'<br>R: 5'-ATGTGGAGGTAGCCCTCGAT-3'       | 102              |
| IGFBP3                 | NM_174556.1      | F: 5'-AGCGTGAGACAGAATACGGG-3'<br>R: 5'-AGCCCTTCTTGTCGCAGTTG-3'       | 120              |
| HIF-1 $\alpha$         | NM_174339.3      | F: 5'-TTCCATCTCCTCCCCACGTA-3'<br>R: 5'-AGGCTGTCCGACTTCCAGTA-3'       | 81               |
| EPO                    | NM_173909.2      | F: 5'-TCTCCCTTCCAGATGCAACC-3'<br>R: 5'-CTTCCCCCGCAGGAAATTGG-3'       | 104              |
| EPOR                   | NM_001205601.1   | F: 5'-CTCGTCCTCGTGCTCATTCT-3'                                        | 117              |

|       |             |                                    |     |
|-------|-------------|------------------------------------|-----|
|       |             | R:5'-GCCTTCAAACCTCGCTCTCAG-3'      |     |
|       |             | F: 5'-GGGAACCTCAGTCACACAGGTTGG-3'  |     |
| SOCS2 | NM_177523.2 | R:5'-TGTTAGTAGGTAGTCTGAATGCGAAC-3' | 128 |
|       |             | F: 5'-AGAAGATCCCTCTGGTGTGAGC-3'    |     |
| SOCS3 | NM_174466.2 | R:5'-GTGACTTTCTCGTAGGAGTCCAGG-3'   | 109 |

<sup>1</sup> *JAK2* = Janus kinase 2; *STAT5* = Signal transducer activator of transcription 5; *mTOR* = Mammalian target of rapamycin; *S6K1* = Ribosomal protein S6 kinase beta-1; *SREBP1* = Sterol regulatory element-binding protein 1; *PPAR $\gamma$*  = Peroxisome proliferator-activated receptor  $\gamma$ ; *ACC* = Acetyl-CoA carboxylase; *FASN* = Fatty acid synthase; *LPL* = Lipoprotein lipase; *SCD* = Stearyl CoA desaturase; *GH* = Growth hormone; *IGF-1* = Insulin-like growth factor-I; *HIF-1 $\alpha$*  = Hypoxia-inducible factor-1 $\alpha$ ; *SOCS* = Suppressors of cytokine signaling; *PI3K* = Phosphoinositide 3-kinase; *AKT1* = RAC-alpha serine/threonine-protein kinase; *IGFBPs* = Insulin-like growth factor binding protein; *IGF-1R* = Type 1 insulin-like growth factor receptor; *ELF5* = E74-like factor 5; *4EBP1* = Eukaryotic translation initiation factor 4E binding protein 1; *eIF-4E* = Eukaryotic initiation factor 4E; *PSMA5* = Proteasome 20s subunit  $\alpha$ 5; *GHR* = Growth hormone receptor; *EPO* = Erythropoietin; *EPOR* = Erythropoietin receptor.

### Materials and Methods:

HiFi Script cDNA Synthesis Kit (CWBIO, Beijing, China) according to the manufacturer's instructions. The reaction was carried out in a volume of 20  $\mu$ L containing 4  $\mu$ L of dNTP mix, 2  $\mu$ L of primer mix, 4  $\mu$ L of 5  $\times$  RT buffer, 2  $\mu$ L of DTT, 1  $\mu$ L of HiFi Script, and 1  $\mu$ g of the RNA template, and the cDNA was synthesized by incubating the reaction mixture at 42 °C for 15 min followed by 85 °C for 5 min.

**Table S2.** Antibodies used for Western Blot.

| Antibodies name                                        | Diluted multiples | Accession Number | Reagent company |
|--------------------------------------------------------|-------------------|------------------|-----------------|
| rabbit anti- $\beta$ -actin polyclonal antibody        | 1:2000            | bs-0061R         | Bioss           |
| rabbit anti- $\beta$ -casein polyclonal antibody       | 1:2000            | bs-10032R        | Bioss           |
| rabbit anti-phospho-STAT5- $\beta$ polyclonal antibody | 1:2000            | bs-5703R         | Bioss           |
| rabbit anti-mTOR polyclonal antibody                   | 1:2000            | bs-1992R         | Bioss           |
| rabbit anti-phospho-mTOR polyclonal antibody           | 1:2000            | bs-3494R         | Bioss           |
| rabbit anti-S6K1 polyclonal antibody                   | 1:2000            | bs-6370R         | Bioss           |
| rabbit anti-phospho-S6K1 polyclonal antibody           | 1:2000            | bs-5668R         | Bioss           |
| rabbit anti-SCD polyclonal antibody                    | 1:2000            | bs-3787R         | Bioss           |
| mouse anti-PSMA5 polyclonal antibody                   | 1:2000            | bsm-51520M       | Bioss           |
| rabbit anti-SREBP1 polyclonal antibody                 | 1:2000            | bs-1402R         | Bioss           |
| rabbit anti-PPAR $\gamma$ polyclonal antibody          | 1:2000            | bs-0530R         | Bioss           |
| rabbit anti-HIF-1 $\alpha$ polyclonal antibody         | 1:2000            | bs-0737R         | Bioss           |
| rabbit anti-SOCS2 polyclonal antibody                  | 1:2000            | bs-1896R         | Bioss           |
| rabbit anti-SOCS3 polyclonal antibody                  | 1:2000            | bs-24250R        | Bioss           |
| goat anti-rabbit IgG antibody                          | 1:4000            | ab6721           | abcam           |
| rabbit anti-mouse IgG antibody                         | 1:4000            | ab6728           | abcam           |
